# Supplementary material for: Impact of Variants in the ATIC and ARID5B Genes on Therapeutic Failure with Imatinib in Patients with Chronic Myeloid Leukemia
Source: MDPI journal article supplement (doi:10.3390/genes13020330), 2022-02-10
Supplement: s1 [file s1]

**Table S1:** Polymorphisms chosen after applying the criteria of selection

| Gene          | SNP        | Allele | Function        | Amino acid substitution | Chromosome | Location  |
|---------------|------------|--------|-----------------|-------------------------|------------|-----------|
| <i>ABCC1</i>  | rs28364006 | A>G    | Missense        | Thr1337Ala              | 16         | 16134392  |
| <i>ABCC2</i>  | rs717620   | C>T    | 5' UTR          | -                       | 10         | 99782821  |
| <i>ABCC3</i>  | rs9895420  | T>A    | 5' Flanking     | -                       | 17         | 50634677  |
| <i>AMPD1</i>  | rs17602729 | G>A    | Stop Codon      | Gln45Ter                | 1          | 114693436 |
| <i>ARID5B</i> | rs10821936 | C>T    | Intronic        | -                       | 10         | 61963818  |
| <i>ATIC</i>   | rs2372536  | C>G    | Missense        | Thr116Ser               | 2          | 215325297 |
| <i>ATIC</i>   | rs4673993  | T>C    | Splicing region | -                       | 2          | 215347616 |
| <i>CCND1</i>  | rs9344     | G>A    | Synonym         | Pro241Pro               | 11         | 69648142  |
| <i>CDKN2A</i> | rs3731217  | A>C    | Intra-genic     | -                       | 9          | 21984662  |
| <i>CEBPE</i>  | rs2239633  | G>A    | 5' UTR          | -                       | 14         | 23119848  |
| <i>GGH</i>    | rs11545078 | G>A    | Missense        | Thr151Ile               | 8          | 63026205  |
| <i>GGH</i>    | rs1800909  | A>G    | Missense        | Cys6Arg                 | 8          | 63038753  |
| <i>GGH</i>    | rs3758149  | G>A    | 5' Flanking     | -                       | 8          | 63039169  |
| <i>IKZF1</i>  | rs4132601  | T>G    | UTR '3          | -                       | 7          | 50402906  |
| <i>ITPA</i>   | rs1127354  | C>A    | Missense        | Pro15Thr                | 20         | 3213196   |
| <i>MTHFD1</i> | rs2236225  | G>A    | Missense        | Arg653Gln               | 14         | 64442127  |
| <i>MTHFR</i>  | rs1801133  | G>A    | Missense        | Ala222Val               | 1          | 11796321  |
| <i>MTRR</i>   | rs1801394  | A>G    | Missense        | Ile22Met                | 5          | 7870860   |
| <i>NALCN</i>  | rs7992226  | A>G    | Intronic        | -                       | 13         | 101145489 |
| <i>NOS3</i>   | rs1799983  | T>G    | Missense        | Asp298Glu               | 7          | 150999023 |

|                |            |     |             |           |    |           |
|----------------|------------|-----|-------------|-----------|----|-----------|
| <i>PIP4K2A</i> | rs7088318  | C>A | Intra-genic | -         | 10 | 22564019  |
| <i>SHMT1</i>   | rs1979277  | G>A | Missense    | Leu435Phe | 17 | 18328782  |
| <i>SLCO1B1</i> | rs2306283  | A>G | Missense    | Asn130Asp | 12 | 21176804  |
| <i>SLCO1B1</i> | rs4149015  | G>A | 5' Flanking | -         | 12 | 21130388  |
| <i>SLCO1B1</i> | rs4149056  | T>C | Missense    | Val174Ala | 12 | 21178615  |
| <i>TLR4</i>    | rs4986790  | A>G | Missense    | Asp99Gly  | 9  | 117713024 |
| <i>TNFAIP3</i> | rs6920220  | G>A | Intra-genic | -         | 6  | 137685367 |
| <i>TPMT</i>    | rs1800460  | C>T | Missense    | Ala154Thr | 6  | 18138997  |
| <i>TPMT</i>    | rs1800462  | C>G | Missense    | Ala80Pro  | 6  | 18143724  |
| <i>TPMT</i>    | rs1142345  | T>C | Missense    | Tyr240Cys | 6  | 18130687  |
| <i>TPMT</i>    | rs12201199 | A>T | Intrônico   | -         | 6  | 18139571  |
| <i>TPMT</i>    | rs56161402 | C>T | Missense    | Arg215His | 6  | 18130762  |

---

3UTR: 3'UTR regulation; 5UTR: 5'UTR regulation

**Table S2:** Allelic and genotypic distribution and quality control of the polymorphisms.

| Gene/rs                  | Most<br>Frequent<br>Allele | Nucleotide<br>change | Missings <sup>5</sup> | AA <sup>1</sup> | Aa <sup>2</sup> | aa <sup>3</sup> | Missings (%) <sup>4</sup> | MAF <sup>5</sup> |
|--------------------------|----------------------------|----------------------|-----------------------|-----------------|-----------------|-----------------|---------------------------|------------------|
| <i>TPMT</i> rs1142345    | T                          | T>C                  | 42                    | 90              | 30              | 6               | 25.0                      | 16.7             |
| <i>TPMT</i> rs12201199   | A                          | T>C / T>G            | 35                    | 95              | 35              | 3               | 20.8                      | 15.4             |
| <i>SLCO1B1</i> rs4149056 | T                          | T>C                  | 31                    | 94              | 38              | 5               | 18.5                      | 17.5             |
| <i>ABCC2</i> rs717620    | C                          | C>T                  | 29                    | 112             | 25              | 2               | 17.3                      | 10.4             |
| <i>ABCC3</i> rs9895420   | T                          | T>A                  | 27                    | 111             | 29              | 1               | 16.1                      | 11.0             |
| <i>GGH</i> rs11545078    | G                          | G>A                  | 21                    | 114             | 30              | 3               | 12.5                      | 12.2             |
| <i>GGH</i> rs3758149     | G                          | G>A                  | 35                    | 66              | 58              | 9               | 20.8                      | 28.6             |
| <i>ATIC</i> rs2372536    | C                          | C>G                  | 25                    | 81              | 51              | 11              | 14.9                      | 25.5             |
| <i>ATIC</i> rs4673993    | T                          | T>C                  | 25                    | 75              | 55              | 13              | 14.9                      | 28.3             |
| <i>AMPD1</i> rs17602729  | G                          | G>A                  | 35                    | 114             | 17              | 2               | 20.8                      | 7.9              |
| <i>CCND1</i> rs9344      | G                          | G>A                  | 18                    | 55              | 73              | 22              | 10.7                      | 39.0             |
| <i>IKZF1</i> rs4132601   | T                          | T>G                  | 26                    | 90              | 46              | 6               | 15.5                      | 20.4             |
| <i>ITPA</i> rs1127354    | C                          | C>A                  | 44                    | 114             | 10              | -               | 26.2                      | 4.0              |
| <i>MTRR</i> rs1801394    | G                          | A>G                  | 41                    | 47              | 61              | 19              | 24.4                      | 39.0             |
| <i>MTHFD1</i> rs2236225  | G                          | G>A                  | 31                    | 32              | 74              | 31              | 18.5                      | 49.6             |
| <i>NOS3</i> rs1799983    | G                          | T>G                  | 44                    | 121             | 3               | -               | 26.2                      | 1.2              |
| <i>MTHFR</i> rs1801133   | G                          | G>A                  | 18                    | 69              | 66              | 15              | 10.7                      | 32.0             |
| <i>TLR4</i> rs4986790    | A                          | A>G                  | 31                    | 129             | 8               | -               | 18.5                      | 2.9              |
| <i>TPMT</i> rs1800460    | C                          | C>T                  | 24/48                 | 127             | 13              | 4               | 14.3                      | 7.3              |
| <i>SLCO1B1</i> rs4149015 | G                          | G>A                  | 82                    | 73              | 9               | 4               | 48.8                      | 9.9              |
| <i>GGH</i> rs1800909     | A                          | A>G                  | 27                    | 132             | 5               | 4               | 16.1                      | 4.6              |
| <i>ARID5B</i> rs10821936 | T                          | C>T                  | 26                    | 42              | 59              | 41              | 15.5                      | 49.6             |
| <i>NALCN</i> rs7992226   | A                          | A>G                  | 46                    | 50              | 47              | 25              | 27.4                      | 39.8             |
| <i>SHMT1</i> rs1979277   | A                          | G>A                  | 67                    | 63              | 27              | 11              | 39.9                      | 24.3             |
| <i>SLCO1B1</i> rs2306283 | G                          | A>G                  | 52                    | 35              | 59              | 22              | 31.0                      | 44.4             |
| <i>CEBPE</i> rs2239633   | G                          | G>A                  | 53                    | 50              | 53              | 12              | 31.5                      | 33.5             |
| <i>PIP4K2A</i> rs7088318 | A                          | C>A                  | 53                    | 31              | 67              | 17              | 31.5                      | 43.9             |
| <i>TNFAIP3</i> rs6920220 | G                          | G>A                  | 58                    | 79              | 30              | 1               | 34.5                      | 14.5             |
| <i>TPMT</i> rs1800462    | C                          | C>G                  | 28                    | 140             | -               | -               | 16.7                      | 0.0              |
| <i>TPMT</i> rs56161402   | C                          | C>T                  | 33                    | 270             | -               | -               | 19.6                      | 0.0              |
| <i>ABCC1</i> rs28364006  | A                          | A>G                  | 15                    | 153             | -               | -               | 8.9                       | 0.0              |
| <i>CDKN2A</i> rs3731217  | A                          | A>C                  | 47                    | 121             | -               | -               | 28.0                      | 0.0              |

<sup>1</sup>AA: Most frequent homozygote; <sup>2</sup>Aa: Heterozygote; <sup>3</sup>aa: Less frequent homozygote; <sup>4</sup>Genotyping data not obtained; <sup>5</sup>MAF: minor frequency allele

**Table S3.** Odds ratio and genotype distributions of the polymorphisms not statistically significant between the patients with response and without response.

| Genotype         | Responders (%) | No responders (%) | OR (95% CI) | Lower | Upper | p-value |
|------------------|----------------|-------------------|-------------|-------|-------|---------|
| TPMT rs1142345   |                |                   |             |       |       |         |
| TT               | 57 (71.2)      | 32 (71.1)         | 1.00        |       |       | 0.25    |
| CT               | 21 (26.2)      | 9 (20.0)          | 0.76        | 0.31  | 1.86  |         |
| CC               | 2 (2.5)        | 4 (8.9)           | 3.56        | 0.62  | 20.54 |         |
| TPMT rs12201199  |                |                   |             |       |       |         |
| AA               | 54 (67.5)      | 40 (78.4)         | 1.00        |       |       | 0.15    |
| AT               | 25 (31.2)      | 9 (17.6)          | 0.49        | 0.2   | 1.15  |         |
| TT               | 1 (1.2)        | 2 (3.9)           | 2.7         | 0.24  | 30.82 |         |
| SLC01B1 rs414956 |                |                   |             |       |       |         |
| TT               | 61 (74.4)      | 33 (62.3)         | 1.00        |       |       | 0.30    |
| CT               | 18 (22.0)      | 18 (34.0)         | 1.85        | 0.85  | 4.03  |         |
| CC               | 3 (3.7)        | 2 (3.8)           | 1.23        | 0.2   | 7.75  |         |
| ABCC2 rs717620   |                |                   |             |       |       |         |
| CC               | 66 (80.5)      | 44 (81.5)         | 1.00        |       |       | 0.93    |
| CT               | 15 (18.3)      | 9 (16.7)          | 0.9         | 0.36  | 2.24  |         |
| TT               | 1 (1.2)        | 1 (1.9)           | 1.5         | 0.09  | 24.62 |         |
| ABCC3 rs9895420  |                |                   |             |       |       |         |
| TT               | 68 (81.0)      | 41 (75.9)         | 1.00        |       |       | 0.63    |
| AT               | 15 (17.9)      | 13 (24.1)         | 1.44        | 0.62  | 3.32  |         |
| AA               | 1 (1.2)        | 0 (0.0)           | 0.00        | 0.00  |       |         |
| GGH rs11545078   |                |                   |             |       |       |         |
| GG               | 68 (78.2)      | 43 (75.4)         | 1.00        |       |       | 0.88    |
| AG               | 17 (19.5)      | 13 (22.8)         | 1.21        | 0.53  | 2.74  |         |
| AA               | 2 (2.3)        | 1 (1.8)           | 0.79        | 0.07  | 8.99  |         |
| GGH rs3758149    |                |                   |             |       |       |         |
| GG               | 40 (50.6)      | 24 (47.1)         | 1.00        |       |       | 0.59    |
| AG               | 35 (44.3)      | 22 (43.1)         | 1.05        | 0.5   | 2.19  |         |
| AA               | 4 (5.1)        | 5 (2.08)          | 2.08        | 0.51  | 8.52  |         |
| ATIC rs2372536   |                |                   |             |       |       |         |
| CC               | 51 (60.0)      | 29 (52.7)         | 1.00        |       |       | 0.22    |
| CG               | 30 (35.3)      | 19 (34.5)         | 1.11        | 0.53  | 2.32  |         |
| GG               | 4 (4.7)        | 7 (12.7)          | 3.08        | 0.83  | 11.41 |         |
| ATIC rs4673993   |                |                   |             |       |       |         |
| TT               | 49 (57.0)      | 25 (46.3)         | 1.00        |       |       | 0.33    |
| CT               | 31 (36.0)      | 22 (40.7)         | 1.39        | 0.67  | 2.88  |         |
| CC               | 6 (7.0)        | 7 (13.0)          | 2.29        | 0.69  | 7.53  |         |
| AMPD1 rs17602729 |                |                   |             |       |       |         |
| GG               | 71 (87.7)      | 41 (82.0)         | 1.00        |       |       | 0.38    |
| AG               | 8 (9.9)        | 9 (18.0)          | 1.95        | 0.70  | 5.44  |         |

|                          |           |           |      |      |       |      |
|--------------------------|-----------|-----------|------|------|-------|------|
| AA                       | 2 (2.5)   | 0 (0.0)   | 0.00 | 0.00 |       |      |
| <i>CCND</i> rs9344       |           |           |      |      |       |      |
| GG                       | 35 (38.5) | 20 (35.7) | 1.00 |      |       | 0.93 |
| AG                       | 43 (47.3) | 27 (48.2) | 1.10 | 0.53 | 2.28  |      |
| AA                       | 13 (14.3) | 9 (16.1)  | 1.21 | 0.44 | 3.33  |      |
| <i>IKZF1</i> rs4132601   |           |           |      |      |       |      |
| TT                       | 57 (66.3) | 32 (60.4) | 1.00 |      |       | 0.43 |
| GT                       | 25 (29.1) | 20 (37.7) | 1.42 | 0.69 | 2.96  |      |
| GG                       | 4 (4.7)   | 1 (1.9)   | 0.45 | 0.05 | 4.16  |      |
| <i>ITPA</i> rs1127354    |           |           |      |      |       |      |
| CC                       | 71 (93.4) | 41 (89.1) | 1.00 |      |       | 0.40 |
| AC                       | 5 (6.6)   | 5 (10.9)  | 1.73 | 0.47 | 6.34  |      |
| <i>MTRR</i> rs1801394    |           |           |      |      |       |      |
| AA                       | 26 (32.9) | 20 (42.6) | 1.00 |      |       | 0.52 |
| AG                       | 41 (51.9) | 20 (42.6) | 0.63 | 0.29 | 1.4   |      |
| GG                       | 12 (15.2) | 7 (14.9)  | 0.76 | 0.25 | 2.28  |      |
| <i>MTHFD1</i> rs2236225  |           |           |      |      |       |      |
| GG                       | 19 (22.6) | 13 (25.5) | 1.00 |      |       | 0.79 |
| AG                       | 48 (57.1) | 26 (51.0) | 0.79 | 0.34 | 1.86  |      |
| AA                       | 17 (20.2) | 12 (23.5) | 1.03 | 0.37 | 2.87  |      |
| <i>NOS3</i> rs1799983    |           |           |      |      |       |      |
| GG                       | 76 (98.7) | 43 (95.6) | 1.00 |      |       | 0.29 |
| GT                       | 1 (1.3)   | 2 (4.4)   | 3.53 | 0.31 | 40.13 |      |
| <i>MTHFR</i> rs1801133   |           |           |      |      |       |      |
| GG                       | 44 (48.9) | 25 (43.9) | 1.00 |      |       | 0.50 |
| GA                       | 40 (44.4) | 25 (43.9) | 1.10 | 0.55 | 2.22  |      |
| AA                       | 6 (6.7)   | 7 (12.3)  | 2.05 | 0.62 | 6.79  |      |
| <i>TLR4</i> rs4986790    |           |           |      |      |       |      |
| AA                       | 77 (92.8) | 50 (96.2) | 1.00 |      |       | 0.40 |
| AG                       | 6 (7.2)   | 2 (3.8)   | 0.51 | 0.1  | 2.64  |      |
| <i>TPMT</i> rs1800460    |           |           |      |      |       |      |
| CC                       | 77 (89.5) | 47(85.5)  | 1.00 |      |       | 0.05 |
| CT                       | 9 (10.5)  | 4 (7.3)   | 0.73 | 0.21 | 2.50  |      |
| TT                       | 0 (0)     | 4 (7.3)   |      | 0.00 |       |      |
| <i>GGH</i> rs1800909     |           |           |      |      |       |      |
| AA                       | 79 (95.2) | 50 (90.9) | 1.00 |      |       | 0.35 |
| AG                       | 3 (3.6)   | 2 (3.6)   | 1.05 | 0.17 | 6.53  |      |
| GG                       | 1 (1.2)   | 3 (5.5)   | 4.74 | 0.48 | 46.84 |      |
| <i>ARID5B</i> rs10821936 |           |           |      |      |       |      |
| TT                       | 22 (25.9) | 20(37.0)  | 1.00 |      |       | 0.30 |
| CT                       | 36 (42.4) | 22 (40.7) | 0.67 | 0.30 | 1.50  |      |
| CC                       | 27 (31.8) | 12 (22.2) | 0.49 | 0.20 | 1.22  |      |
| <i>NALCN</i> rs7992226   |           |           |      |      |       |      |
| AA                       | 27 (37.5) | 21 (43.8) | 1.00 |      |       | 0.38 |

|    |           |           |      |      |      |
|----|-----------|-----------|------|------|------|
| AG | 27 (37.5) | 20 (41.7) | 0.95 | 0.42 | 2.15 |
| GG | 18 (25.0) | 7 (14.6)  | 0.50 | 0.18 | 1.42 |

---
